# Supplementary material for: Beneficial Shifts in Gut Microbiota by Lacticaseibacillus rhamnosus R0011 and Lactobacillus helveticus R0052 in Alcoholic Hepatitis
Source: MDPI journal article supplement (doi:10.3390/microorganisms10071474), 2022-07-21
Supplement: s1 [file s1]

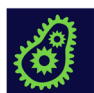

Supplementary materials

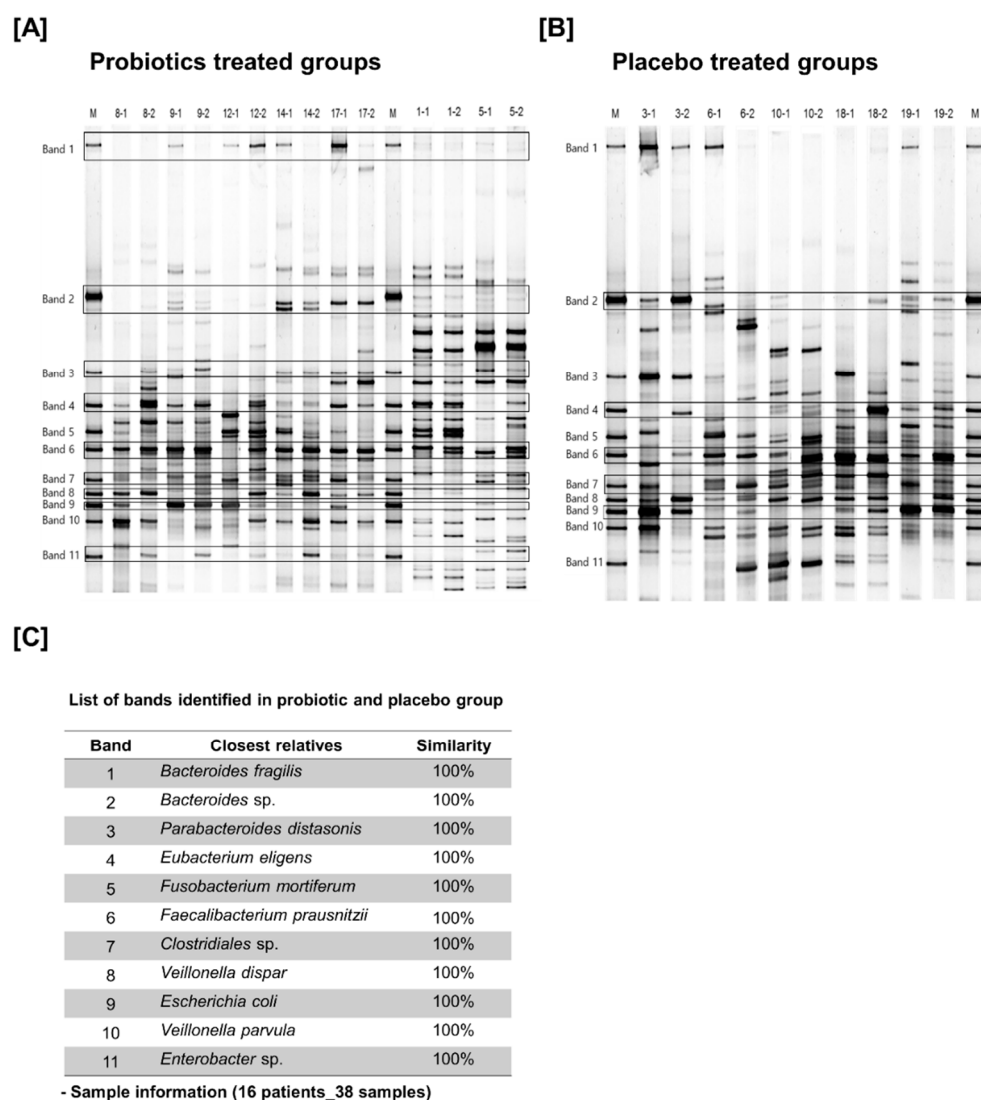

**Figure S1.** Denaturing gradient gel electrophoresis (DGGE) analysis of fecal samples of patients before and after treatment [A] Probiotic treated groups (n=14). [B] Placebo treated groups (n=10). [C] List of bands identified in probiotic and placebo group.

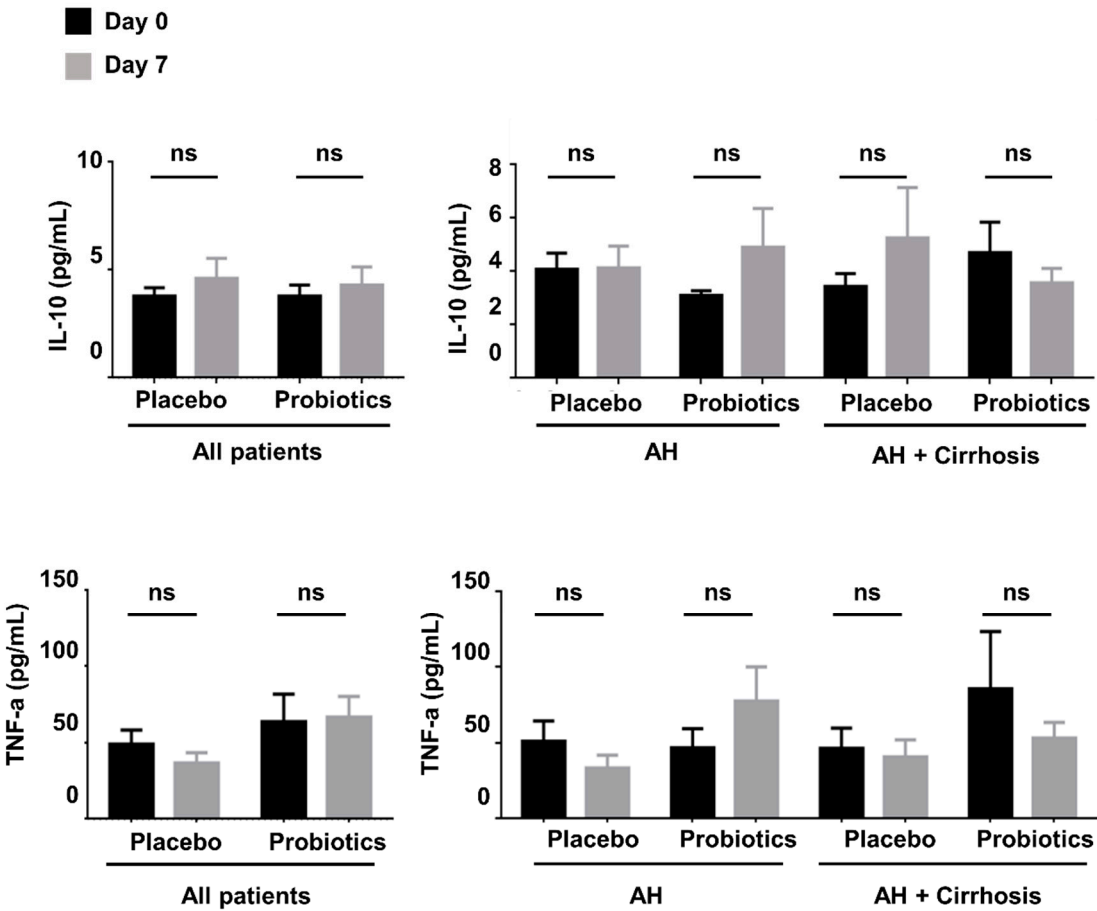

**Figure S2.** Serum measurement of cytokines level in patients before and after treatment. [A] Interleukin-10 level. [B] Tumor necrosis factor-α level.

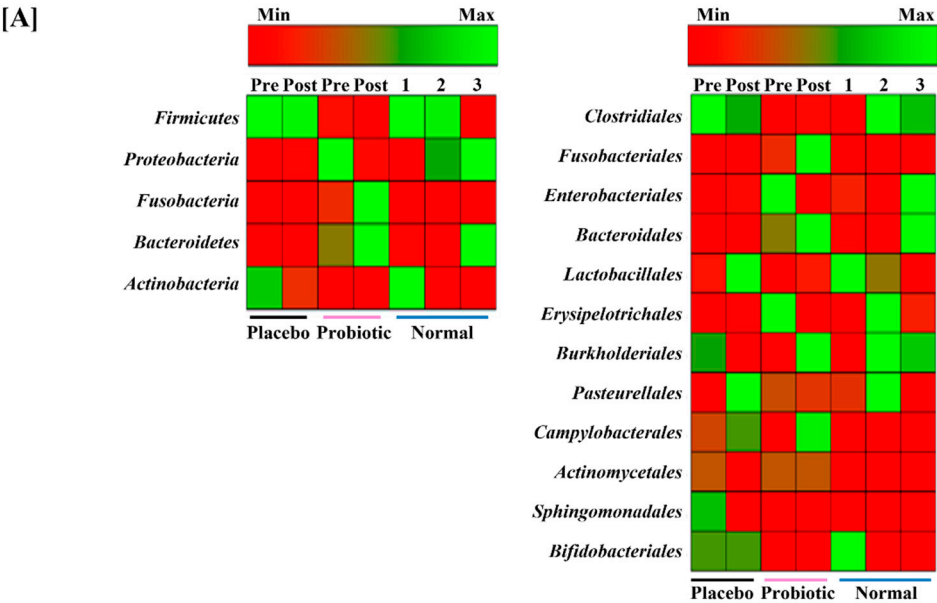

**Figure S3.** Microbial change after treatment. [A] Heatmaps depicting changes in phylum and class level after placebo and probiotic treatment. [B] Changes in relative abundance of species in probiotic and placebo groups after 7 days treatment.
